# Supplementary material for: Extracorporeal carbon dioxide removal for patients with acute respiratory failure secondary to the acute respiratory distress syndrome: a systematic review
Source: Crit Care. 2014 May 15;18(3):222. doi: 10.1186/cc13875 (PMC4056779; doi:10.1186/cc13875)
Supplement: Additional file 3 — A table presenting excluded articles [49-54]. [file cc13875-S3.docx]

**Additional file 3 Excluded papers**

| Author | **Year** | **Journal** | **Title** | **Reason for exclusion** |
| --- | --- | --- | --- | --- |
| Atalan et al 33  Mattei et al 32  Muller et al 51 | 2013    2011  2009 | Critical Care  European Journal of Anaesthesiology  European Respiratory Journal | Combined use of pumpless extracorporeal lung assist system and continuous renal replacement therapy with citrate  anticoagulation in polytrauma patients  Extracorporeal CO2 removal in ICU  Extracorporeal pumpless interventional lung assist in clinical practice: determinants of efficacy | Limited data available  Limited data available  Repetition of dataset - previously published |
| Bein T et al 50 | 2004 | Anaesthesist | Pumpless extracorporeal lung assist using arterio-venous shunt in severe ARDS. Experience with 30 cases | Repetition of dataset - subsequently published |
| Belghith et al 49 | 1993 | La Revue du Praticien | Low frequency positive-pressure ventilation and extracorporeal CO2 removal. Treatment of acute respiratory distress syndrome in adults. | Review article (no abstract available) |
| Sittig DF et al 52 | 1989 | Computer Methods & Programs in Biomedicine | Computerized management of patient care in a complex, controlled clinical trial in the intensive care unit. | Study Protocol – no outcome data |
| Marcolin et al 53 | 1986 | ASAIO transactions / American Society for Artificial Internal Organs | Ventilatory impact of partial extracorporeal CO2 removal (PECOR) in ARF patients | Review article (no abstract available) |
| Hickling K.G. 54 | 1986 | Anaesthesia and Intensive Care | Extracorporeal CO2 Removal in severe adult respiratory distress syndrome. | Review article |

References

49. Belghith M, Brunet F: [**Low frequency positive-pressure ventilation and extracorporeal CO2 removal. Treatment of acute respiratory distress syndrome in adults**] **Ventilation apneique et epuration extracorporelle de CO2. Traitement du syndrome de detresse respiratoire aigue de l'adulte.** *Rev Prat* 1993, **43:**2089-2092.

50. Bein T, Prasser C, Philipp A, Müller T, Weber F, Schlitt HJ, Schmid FX, Taeger K, Birnbaum D: **Pumpless extracorporeal lung assist using arterio-venous shunt in severe ARDS. Experience with 30 cases.** *Anaesthesist* 2004, **53:**813-819.

51. Müller T, Lubnow M, Philipp A, Bein T, Jeron A, Luchner A, Rupprecht L, Reng M, Langgartner J, Wrede CE, Zimmermann M, Birnbaum D, Schmid C, Riegger GA, Pfeifer M: **Extracorporeal pumpless interventional lung assist in clinical practice: determinants of efficacy.** *Eur Respir J* 2009, **33:**551-558.

52. Sittig DF, Gardner RM, Pace NL, Morris AH, Beck E: **Computerized management of patient care in a complex, controlled clinical trial in the intensive care unit.** *Comput Methods Programs Biomed* 1989, **30:**77-84.

53. Marcolin R, Mascheroni D, Pesenti A, Bombino M, Gattinoni L: **Ventilatory impact of partial extracorporeal CO2 removal (PECOR) in ARF patients.** *ASAIO Trans* 1986, **32:**508-510.

54. Hickling KG: **Extracorporeal CO2 removal in severe adult respiratory distress syndrome.** *Anaesthesia Intensive Care* 1986, **14:**46-53.
